# Supplementary material for: A liquid biomarker signature of inflammatory proteins accurately predicts early pancreatic cancer progression during FOLFIRINOX chemotherapy
Source: PubMed Central journal article supplement (PMC10873733; doi:10.1016/j.neo.2024.100975), 2024-02-09

### Supplementary Figure S3

AUC according to the number of features in the second model (using protein & gene expression data)

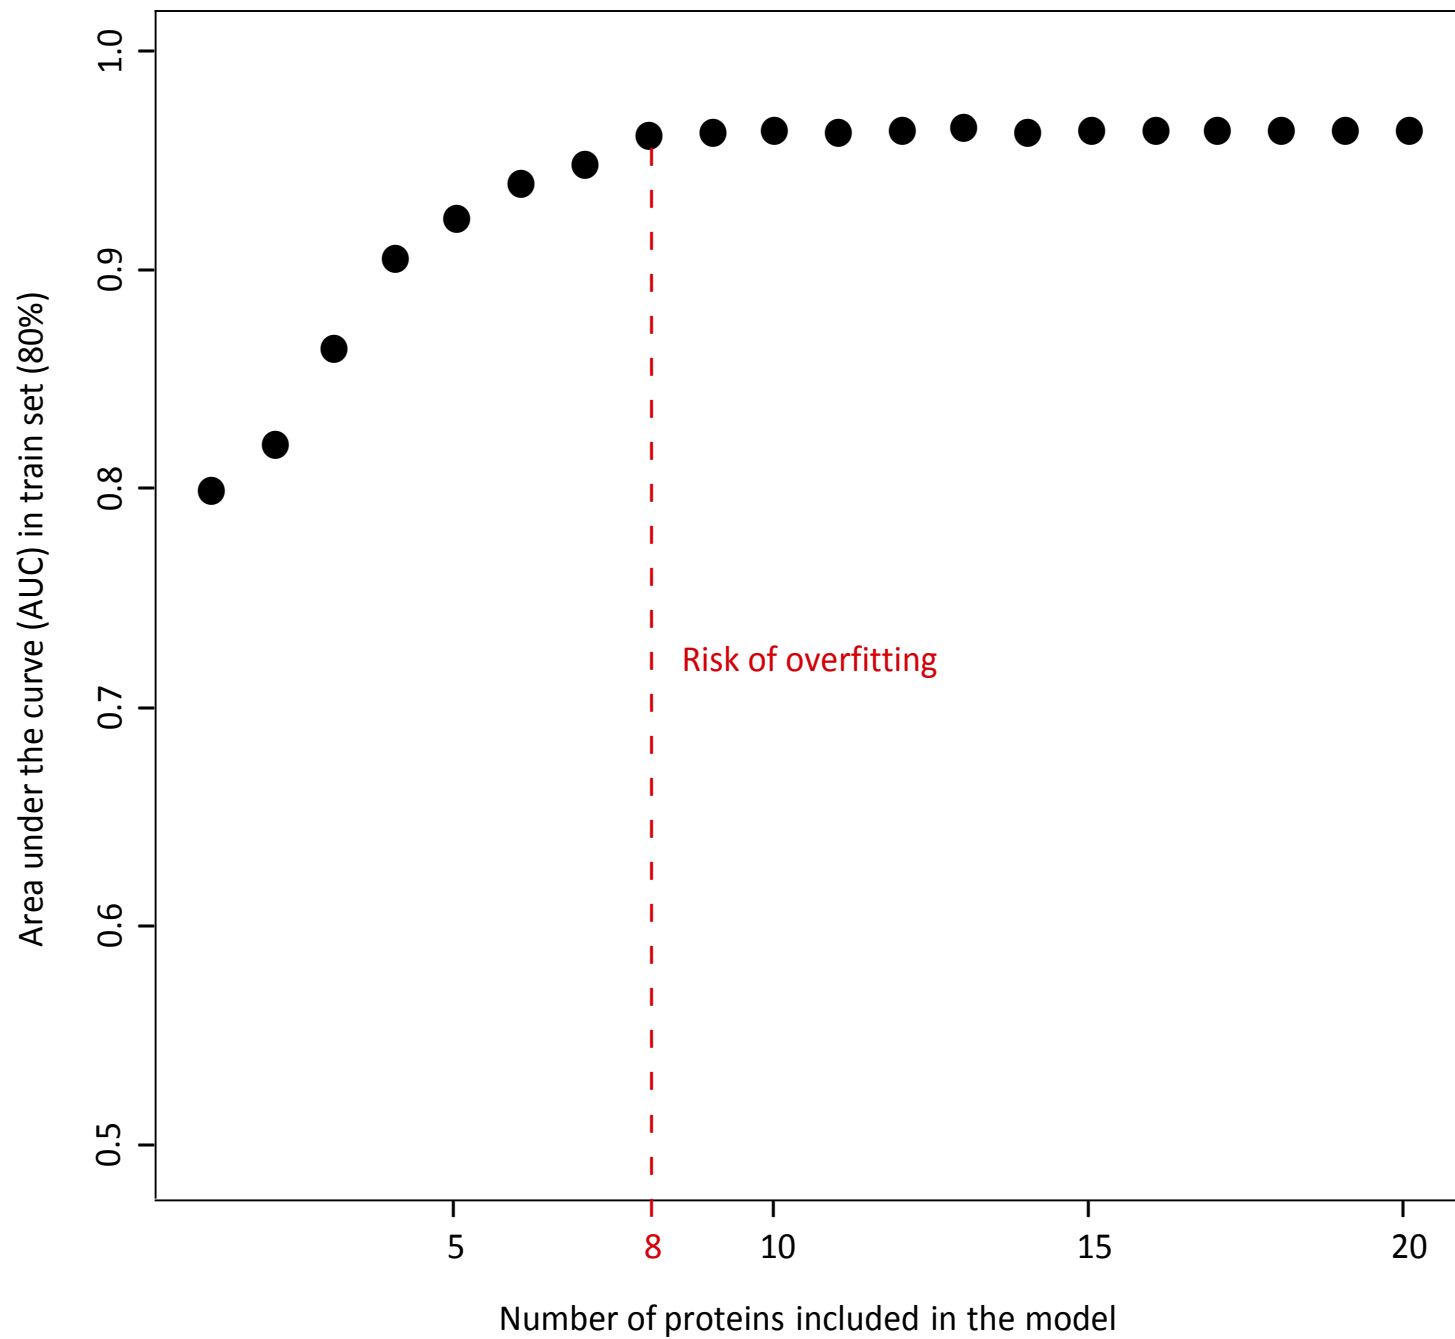

Supplement: mmc3.pdf [file mmc3.pdf]
