# Supplementary material for: A liquid biomarker signature of inflammatory proteins accurately predicts early pancreatic cancer progression during FOLFIRINOX chemotherapy
Source: PubMed Central journal article supplement (PMC10873733; doi:10.1016/j.neo.2024.100975), 2024-02-09

## Supplementary Figure S4

Boxplots displaying the expression levels of features included in the second model (integrating gene and protein expression data)

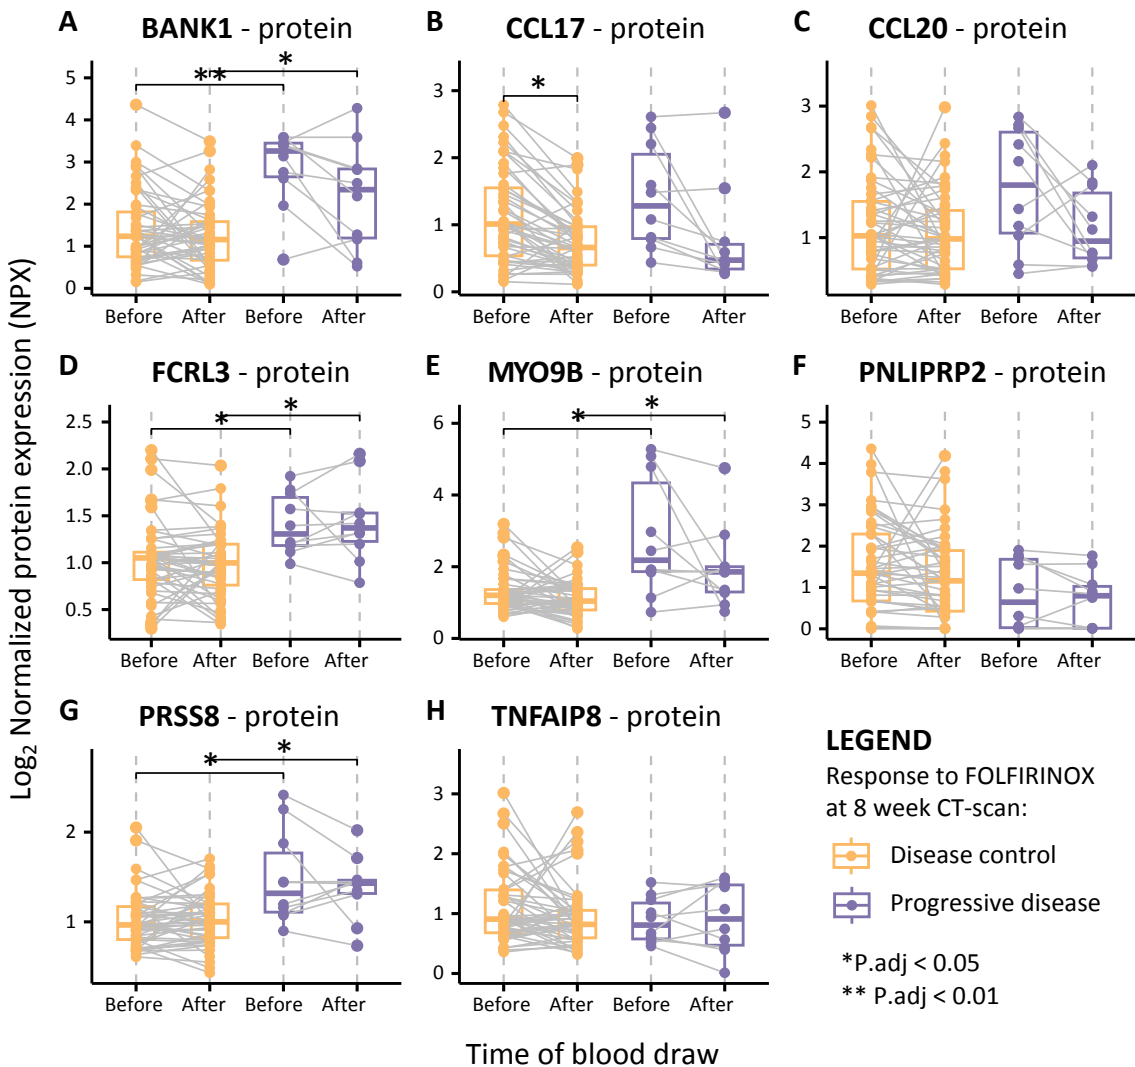

Supplement: mmc4.pdf [file mmc4.pdf]
